# Supplementary material
Source: publisher figshare collection journal article supplement (https://frontiersin.figshare.com/ndownloader/files/13162520)
Supplement: Supplementary file 1 [file 13162520]

## **Supplemental Methods 1:**

We conducted searches using Web of Science (Core collection; v.5.18) to determine the number of papers published in the last 25 years with a movement ecology theme. Our search of “Topics” was conducted using the following terms: (((movement OR migrat\* OR "home range" OR dispersal OR track\*) SAME ecology)). We conducted a second search within the same results to identify the number of papers within this group that included conservation, management, and/or protection as topics. This second search included the addition of: (conserv\* OR recover\* OR manag\* OR protect\*). We also refined both searches to the following research areas: ENVIRONMENTAL SCIENCES; ECOLOGY; ZOOLOGY; MARINE FRESHWATER BIOLOGY; BIODIVERSITY CONSERVATION; EVOLUTIONARY BIOLOGY; PLANT SCIENCES; OCEANOGRAPHY; SCIENCE TECHNOLOGY OTHER TOPICS; ENTOMOLOGY; FISHERIES

## **Supplemental Methods 2:**

We conducted searches using Web of Science (Core collection; v.5.18) to find movement ecology research for our 12 target species that has been published in the last 25 years. Our search of “Topics” was conducted using the following terms: “Movement” OR “migrat\*” OR “tag\*” OR “distribution” OR “habitat use” OR “telemetry” OR “satellite” OR “track\*” OR “occurrence” OR “mark-recapture” OR “home range” OR “dispers\*”. It is possible that not all studies about species’ movement ecology is captured by these search parameters (for example, not all papers are available through Web of Science); however, this search string provides a replicable index of available science for each species that could be compared across taxa and agencies.
